# Supplementary material for: Photoluminescence and energy transfer mechanisms of Tm3+ doped Y2O3 laser crystals: experimental and theoretical insights
Source: Royal Society of Chemistry journal article supplement (doi:10.1039/d3cp03692h), 2023-01-01
Supplement: d3cp03692h1.pdf [file d3cp03692h1.pdf]

## Supporting Information

### Photoluminescence and energy transfer mechanisms of $\text{Tm}^{3+}$ doped $\text{Y}_2\text{O}_3$ laser crystals: Experimental and theoretical insights

Meng Ju<sup>1,\*</sup>, Hongkuan Yuan<sup>1</sup>, Wenhao Ji<sup>1</sup>, Lei Zhao<sup>2,\*</sup>, Yang Xiao<sup>3</sup> and Yauyuen Yeung<sup>4,\*</sup>

<sup>1</sup>School of Physical Science and Technology, Southwest University, Chongqing 400715, China

<sup>2</sup>School of Physics and Opto-Electronic Technology, Baoji University of Arts and Science, Baoji,  
Shanxi 721016, China

<sup>3</sup>School of Sciences, Southwest Petroleum University, Chengdu, 610500, China

<sup>4</sup>Department of Science and Environmental Studies, The Education University of Hong Kong, 10  
Lo Ping Road, Tai Po, NT, Hong Kong, China

\*Correspondence author. E-mail: mengju@swu.edu.cn (Meng Ju), zhaoleibjwl@163.com (Lei  
Zhao) and yyyeung@eduhk.hk (Yau-yuen Yeung)

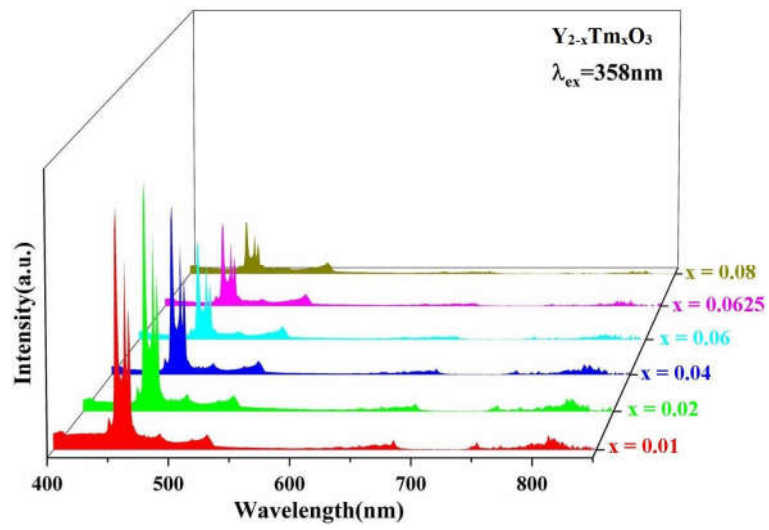

**Figure S1.** Dependence of photoluminescence emission intensities of  $Y_{2-x}Tm_xO_3$  at  $\lambda_{ex} = 358\text{ nm}$  at different  $Tm^{3+}$  concentrations.

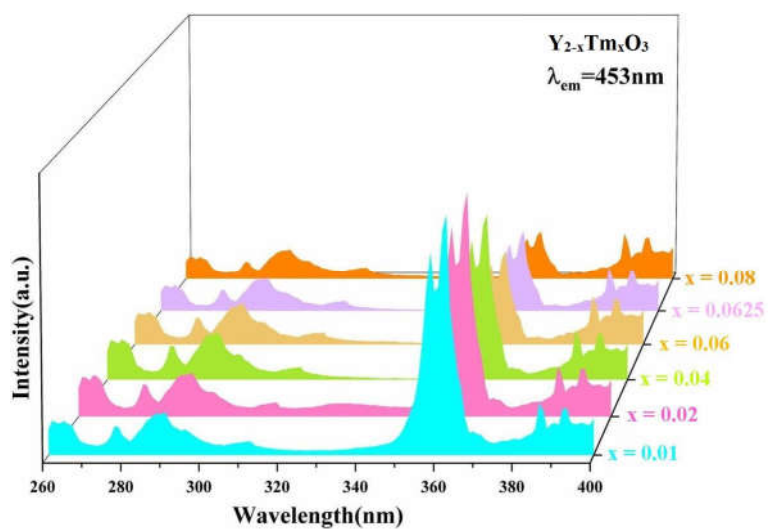

**Figure S2.** Dependence of photoluminescence excitation intensities of  $Y_{2-x}Tm_xO_3$  at  $\lambda_{em} = 453\text{ nm}$  at different  $Tm^{3+}$  concentrations.

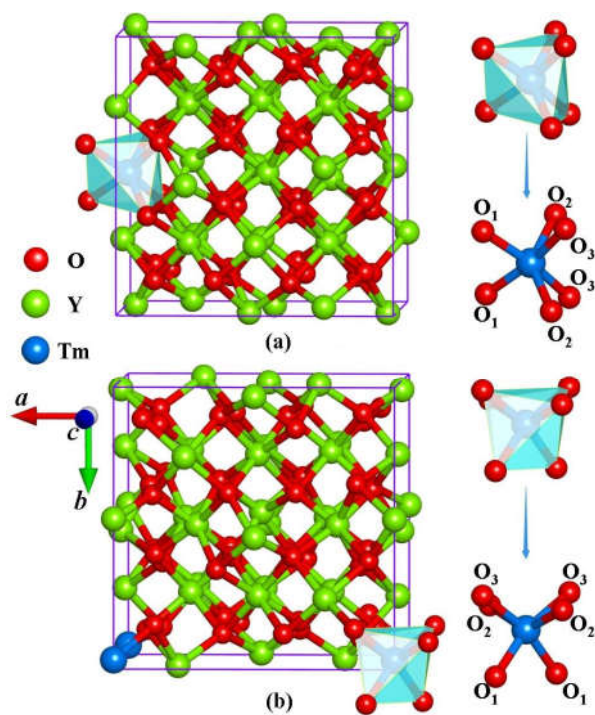

**Figure S3.** The metastable structures (a) and (b) for  $\text{Y}_2\text{O}_3:\text{Tm}^{3+}$ .

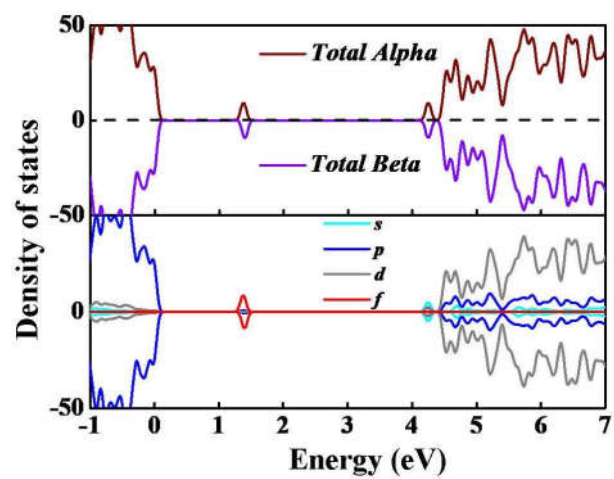

**Figure S4.** The calculated total and partial density of states (DOS) of Y<sub>2</sub>O<sub>3</sub>:Tm<sup>3+</sup>.

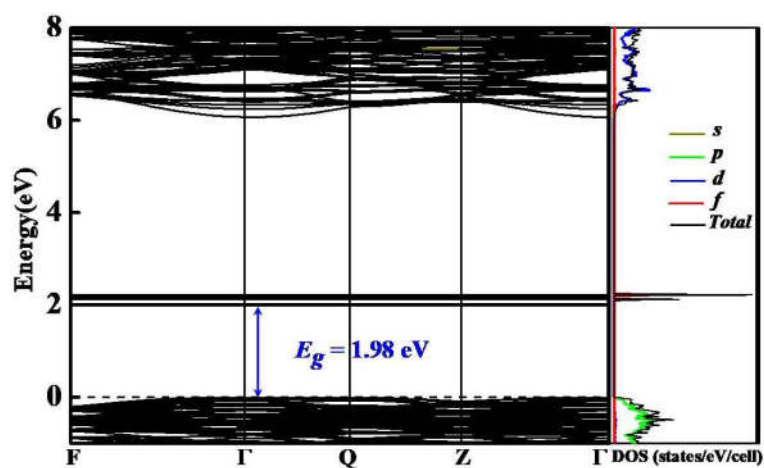

**Figure S5.** The calculated band structure and partial density of states (DOS) of  $\text{Y}_2\text{O}_3:\text{Tm}^{3+}$  using the modified Becke and Johnson (BJ) method as implemented in the reliable Wien2k program.

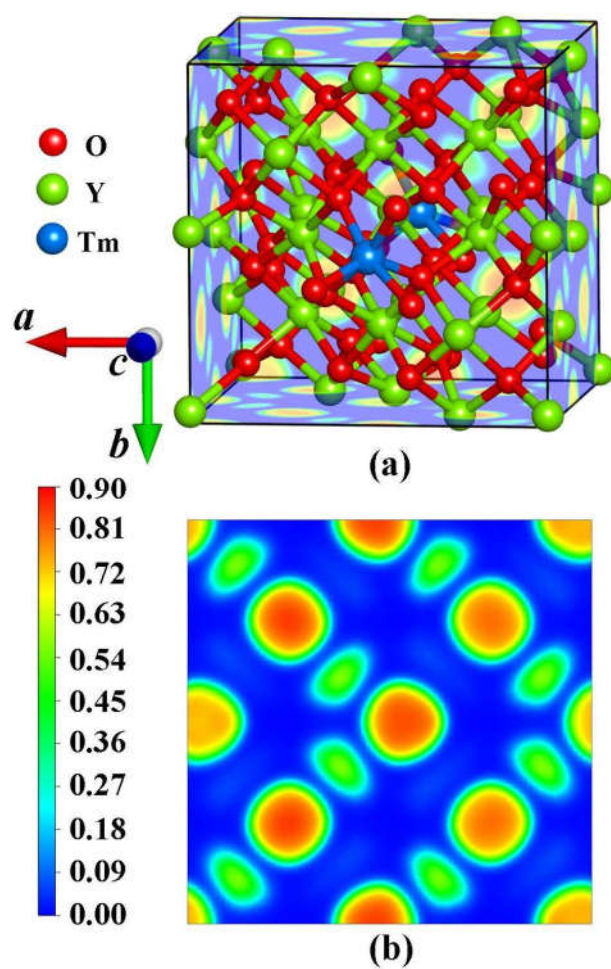

**Figure S6.** (a) Electron localization function (ELF) of Y<sub>2</sub>O<sub>3</sub>:Tm crystal. (b) The ELF of <001> plane for Y<sub>2</sub>O<sub>3</sub>:Tm<sup>3+</sup>.

**Table S1.** Coordinates of all atoms for the ground state  $\text{Y}_2\text{O}_3:\text{Tm}^{3+}$ .

| Atom | $x$      | $y$      | $z$     | Wyckoff site symmetry |
|------|----------|----------|---------|-----------------------|
| Tm   | 0.50000  | 0.53271  | 0.00000 | 1c                    |
| Y1   | 0.00021  | 0.25008  | 0.24996 | 2e                    |
| Y2   | 0.00011  | 0.74992  | 0.75007 | 2e                    |
| Y3   | 0.50052  | 0.74915  | 0.24916 | 2e                    |
| Y4   | 0.49929  | 0.25113  | 0.75091 | 2e                    |
| Y9   | 0.71746  | -0.00002 | 0.24997 | 2e                    |
| Y11  | -0.21806 | 0.49995  | 0.24946 | 2e                    |
| Y13  | 0.00000  | 0.96742  | 0.00000 | 1a                    |
| Y14  | 0.00000  | 0.03263  | 0.50000 | 1b                    |
| Y15  | 0.50000  | 0.46753  | 0.50000 | 1d                    |
| Y16  | -0.25080 | 0.25101  | 0.96759 | 2e                    |
| Y17  | -0.25005 | 0.74994  | 0.53285 | 2e                    |
| Y20  | -0.21773 | 0.00012  | 0.75024 | 2e                    |
| Y21  | 0.28374  | 0.50046  | 0.24879 | 2e                    |
| Y24  | 0.50000  | 0.03267  | 0.00000 | 2e                    |
| Y25  | 0.00000  | 0.53242  | 0.50000 | 1b                    |
| Y26  | 0.00000  | 0.46732  | 0.00000 | 1a                    |
| Y27  | 0.50000  | 0.96727  | 0.50000 | 1d                    |
| Y28  | -0.25076 | 0.74916  | 0.03229 | 2e                    |
| Y29  | 0.25014  | 0.25006  | 0.53229 | 2e                    |
| O1   | 0.14107  | 0.15168  | 0.37963 | 2e                    |
| O2   | 0.63790  | 0.65052  | 0.88192 | 2e                    |
| O3   | -0.14159 | 0.84782  | 0.87970 | 2e                    |
| O4   | 0.35908  | 0.34850  | 0.37863 | 2e                    |
| O9   | 0.13050  | 0.39128  | 0.15146 | 2e                    |
| O10  | 0.62949  | 0.89073  | 0.65222 | 2e                    |
| O11  | 0.62948  | 0.11024  | 0.84834 | 2e                    |
| O12  | 0.13012  | 0.60894  | 0.34791 | 2e                    |
| O17  | -0.09839 | 0.37978  | 0.39089 | 2e                    |
| O18  | 0.40155  | 0.87961  | 0.89106 | 2e                    |
| O21  | 0.40191  | 0.12052  | 0.60933 | 2e                    |
| O22  | -0.09867 | 0.62018  | 0.10888 | 2e                    |
| O25  | 0.35889  | 0.84796  | 0.62032 | 2e                    |
| O26  | -0.14078 | 0.34816  | 0.12034 | 2e                    |
| O27  | 0.64119  | 0.15153  | 0.12008 | 2e                    |
| O28  | 0.14134  | 0.65150  | 0.62041 | 2e                    |



|     |          |         |         |    |
|-----|----------|---------|---------|----|
| O33 | 0.37211  | 0.60606 | 0.85121 | 2e |
| O34 | -0.12976 | 0.10908 | 0.34832 | 2e |
| O35 | -0.12974 | 0.89074 | 0.15163 | 2e |
| O36 | 0.37005  | 0.39117 | 0.65103 | 2e |
| O41 | 0.59808  | 0.62023 | 0.60948 | 2e |
| O42 | 0.09882  | 0.12034 | 0.10864 | 2e |
| O45 | 0.09832  | 0.87977 | 0.39088 | 2e |
| O46 | 0.59545  | 0.38271 | 0.89394 | 2e |

---

**Table S2.** Lattice constants  $a$ ,  $b$  and  $c$ , unit-cell volume, relative energies for the ground state and metastable  $\text{Y}_2\text{O}_3:\text{Tm}^{3+}$  crystals.

|                                       | Space group | $a$ (Å) | $b$ (Å) | $c$ (Å) | $V$ (Å <sup>3</sup> ) | $\Delta E$ (meV) |
|---------------------------------------|-------------|---------|---------|---------|-----------------------|------------------|
| $\text{Y}_2\text{O}_3:\text{Tm}^{3+}$ | $P2$        | 10.6765 | 10.6749 | 10.6758 | 1216.73               | 0                |
| Isomer (a)                            | $P1$        | 10.6748 | 10.6758 | 10.6762 | 1216.68               | 0.358            |
| Isomer (b)                            | $P2$        | 10.6754 | 10.6745 | 10.6752 | 1216.49               | 0.401            |

**Table S3.** Comparison between the calculated and experimental energy levels of  $\text{Tm}^{3+}$  in  $\text{Y}_2\text{O}_3$  (in units of  $\text{cm}^{-1}$ ).

| $^{2s+1}\text{L}_J$ | $E_{\text{expt}}^{[1]}$ | This work         |            | Other            |            |
|---------------------|-------------------------|-------------------|------------|------------------|------------|
|                     |                         | $E_{\text{calc}}$ | $\Delta E$ | $\Delta E^{[1]}$ | $\Delta E$ |
| $^3\text{H}_6$      | 0                       | -51.0             | 51.0       | 73.8             | -73.8      |
| $^3\text{F}_4$      | 5644.3                  | 5690.6            | -46.3      | 5636.7           | 7.6        |
| $^3\text{H}_5$      | 8091.6                  | 8135.6            | -44.0      | 8231.3           | -139.7     |
| $^3\text{H}_4$      | 12500.3                 | 12520.7           | -20.4      | 12535.4          | -35.1      |
| $^3\text{F}_3$      | 14349.1                 | 14330.2           | 18.9       | 14143.8          | 205.3      |
| $^3\text{F}_2$      | 14854.9                 | 14837.3           | 17.6       | 14724.7          | 130.2      |
| $^1\text{G}_4$      | 21324.0                 | 21296.9           | 27.1       | 21319.1          | 4.9        |
| $^1\text{D}_2$      | 27522.9                 | 27515.8           | 7.1        | 27555.7          | -32.8      |
| $^1\text{I}_6$      | —                       | 34388.4           | —          | 33899.0          | 2.3        |
| $^3\text{P}_0$      | 34955.2                 | 34958.6           | -3.4       | 35095.8          | 140.6      |
| $^3\text{P}_1$      | 35791.0                 | 35781.5           | 9.6        | 35822.8          | -31.8      |
| $^3\text{P}_2$      | 37638.3                 | 37655.6           | -17.3      | 37673.3          | -35.0      |
| $^1\text{S}_0$      | —                       | 76562.5           | —          | 77506.1          | —          |

**Table S4.** Calculated wavelengths ( $\lambda$ ), ED ( $A_{ED}$ ) and MD ( $A_{MD}$ ) radiative decay rates, branching ratios ( $\beta$ ) and radiative lifetimes ( $\tau$ ) for spontaneous emission transitions between the first 9 excited states of  $\text{Tm}^{3+}$  in  $\text{Y}_2\text{O}_3$ . Available theoretical and experimental results are also listed for comparison.

| Transition                              | $\lambda$ (nm) |                                              | $A_{ED}$ ( $\text{s}^{-1}$ ) |                                                | $A_{MD}$ ( $\text{s}^{-1}$ ) |                                              | $\beta$ |                     | $\tau$ ( $\mu\text{s}$ ) |                                                                    |
|-----------------------------------------|----------------|----------------------------------------------|------------------------------|------------------------------------------------|------------------------------|----------------------------------------------|---------|---------------------|--------------------------|--------------------------------------------------------------------|
|                                         | Present        | Other                                        | Present                      | Other                                          | Present                      | Other                                        | Present | Other               | Present                  | Other                                                              |
| $^3\text{F}_4 \rightarrow ^3\text{H}_6$ | 1742           | 1698 <sup>[3]</sup> ,<br>1632 <sup>[5]</sup> | 353.6                        | 305.5 <sup>[3]</sup> ,<br>277 <sup>[6]</sup>   | 0                            | 0 <sup>[3]</sup> , 0 <sup>[6]</sup>          | 1.00    | 1.00 <sup>[3]</sup> | 2828                     | 3270 <sup>[3]</sup> , 3500 <sup>[4]</sup> ,<br>3610 <sup>[6]</sup> |
| $^3\text{H}_5 \rightarrow ^3\text{H}_6$ | 1221           | 1199 <sup>[3]</sup>                          | 284.5                        | 234.7 <sup>[3]</sup> ,<br>237 <sup>[6]</sup>   | 101.1                        | 85.7 <sup>[3]</sup> ,<br>84.1 <sup>[6]</sup> | 0.98    | 0.99 <sup>[3]</sup> | 2543                     | 3090 <sup>[3]</sup> , 3310 <sup>[6]</sup>                          |
| $^3\text{H}_5 \rightarrow ^3\text{F}_4$ | 4090           | 4080 <sup>[3]</sup>                          | 7.4                          | 3.1 <sup>[3]</sup>                             | 0.2                          | 0.2 <sup>[3]</sup>                           | 0.02    | 0.01 <sup>[3]</sup> |                          |                                                                    |
| $^3\text{H}_4 \rightarrow ^3\text{H}_6$ | 795            | 788 <sup>[3]</sup> ,<br>766 <sup>[4]</sup>   | 1568.4                       | 1197.1 <sup>[3]</sup> ,<br>1534 <sup>[6]</sup> | 0                            | 0 <sup>[3]</sup>                             | 0.88    | 0.88 <sup>[3]</sup> | 560                      | 734 <sup>[3]</sup> , 310 <sup>[4]</sup> , 639 <sup>[6]</sup>       |
| $^3\text{H}_4 \rightarrow ^3\text{F}_4$ | 1464           | 1470 <sup>[3]</sup> ,<br>1550 <sup>[4]</sup> | 145.1                        | 110.4 <sup>[3]</sup>                           | 26.0                         | 19.8 <sup>[3]</sup> ,<br>31.2 <sup>[6]</sup> | 0.10    | 0.09 <sup>[3]</sup> |                          |                                                                    |
| $^3\text{H}_4 \rightarrow ^3\text{H}_5$ | 2280           | 2300 <sup>[3]</sup>                          | 35.0                         | 26.3 <sup>[3]</sup>                            | 11.6                         | 9.2 <sup>[3]</sup>                           | 0.02    | 0.03 <sup>[3]</sup> |                          |                                                                    |
| $^3\text{F}_3 \rightarrow ^3\text{H}_6$ | 695            | 690 <sup>[3]</sup>                           | 2029.1                       | 1620.2 <sup>[3]</sup> ,<br>2467 <sup>[6]</sup> | 0                            | 0 <sup>[3]</sup>                             | 0.76    | 0.77 <sup>[3]</sup> | 375                      | 473 <sup>[3]</sup> , 394 <sup>[6]</sup>                            |
| $^3\text{F}_3 \rightarrow ^3\text{F}_4$ | 1157           | 1162 <sup>[3]</sup>                          | 52.3                         | 40.0 <sup>[3]</sup>                            | 74.5                         | 61.0 <sup>[3]</sup> ,<br>67.8 <sup>[6]</sup> | 0.05    | 0.05 <sup>[3]</sup> |                          |                                                                    |
| $^3\text{F}_3 \rightarrow ^3\text{H}_5$ | 1614           | 1625 <sup>[3]</sup>                          | 509.8                        | 389.8 <sup>[3]</sup>                           | 0                            | 0 <sup>[3]</sup>                             | 0.19    | 0.18 <sup>[3]</sup> |                          |                                                                    |
| $^3\text{F}_3 \rightarrow ^3\text{H}_4$ | 5526           |                                              | 4.3                          |                                                | 0.3                          |                                              | 0       |                     |                          |                                                                    |

|           |           |       |                                                                    |         |                              |       |                      |      |                     |     |                                                              |
|-----------|-----------|-------|--------------------------------------------------------------------|---------|------------------------------|-------|----------------------|------|---------------------|-----|--------------------------------------------------------------|
| ${}^3F_2$ | ${}^3H_6$ | 672   | 658 <sup>[3]</sup> ,<br>680 <sup>[5]</sup>                         | 502.6   | 424.1 <sup>[3]</sup>         | 0     | 0 <sup>[3]</sup>     | 0.28 | 0.03 <sup>[3]</sup> | 566 | 705 <sup>[3]</sup>                                           |
|           | ${}^3F_4$ | 1093  | 1074 <sup>[3]</sup>                                                | 1016.7  | 781.1 <sup>[3]</sup>         | 0     | 0 <sup>[3]</sup>     | 0.58 | 0.55 <sup>[3]</sup> |     |                                                              |
|           | ${}^3H_5$ | 1492  | 1458 <sup>[3]</sup>                                                | 230.0   | 193.3 <sup>[3]</sup>         | 0     | 0 <sup>[3]</sup>     | 0.13 | 0.14 <sup>[3]</sup> |     |                                                              |
|           | ${}^3H_4$ | 4317  | 3988 <sup>[3]</sup>                                                | 18.4    | 19.0 <sup>[3]</sup>          | 0     | 0 <sup>[3]</sup>     | 0.01 | 0.01 <sup>[3]</sup> |     |                                                              |
|           | ${}^3F_3$ | 19720 |                                                                    | 0.02    |                              | 0.02  |                      | 0    |                     |     |                                                              |
| ${}^1G_4$ | ${}^3H_6$ | 468   | 465 <sup>[3]</sup> ,<br>464 <sup>[4]</sup> ,<br>476 <sup>[5]</sup> | 1646.4  | 1236.5 <sup>[3]</sup>        | 0     | 0 <sup>[3]</sup>     | 0.51 | 0.50 <sup>[3]</sup> | 312 | 408 <sup>[3]</sup> , 170 <sup>[4]</sup> , 286 <sup>[6]</sup> |
|           | ${}^3F_4$ | 641   | 640 <sup>[3]</sup>                                                 | 184.5   | 134.9 <sup>[3]</sup>         | 14.0  | 11.7 <sup>[3]</sup>  | 0.06 | 0.06 <sup>[3]</sup> |     |                                                              |
|           | ${}^3H_5$ | 760   | 760 <sup>[3]</sup>                                                 | 762.3   | 591.4 <sup>[3]</sup>         | 160.7 | 131.2 <sup>[3]</sup> | 0.29 | 0.29 <sup>[3]</sup> |     |                                                              |
|           | ${}^3H_4$ | 1139  | 1134 <sup>[3]</sup>                                                | 310.1   | 247.4 <sup>[3]</sup>         | 41.6  | 33.3 <sup>[3]</sup>  | 0.11 | 0.11 <sup>[3]</sup> |     |                                                              |
|           | ${}^3F_3$ | 1435  | 1426 <sup>[3]</sup>                                                | 57.9    | 46.9 <sup>[3]</sup>          | 4.8   | 3.7 <sup>[3]</sup>   | 0.02 | 0.02 <sup>[3]</sup> |     |                                                              |
|           | ${}^3F_2$ | 1548  |                                                                    | 20.0    |                              | 0     |                      | 0.01 |                     |     |                                                              |
| ${}^1D_2$ | ${}^3H_6$ | 363   | 360 <sup>[3]</sup> ,<br>363 <sup>[4]</sup>                         | 10720.2 | 8436.6 <sup>[3]</sup>        | 0     | 0 <sup>[3]</sup>     | 0.26 | 0.25 <sup>[3]</sup> | 24  | 30 <sup>[3]</sup> , 8.5 <sup>[4]</sup> , 17 <sup>[6]</sup>   |
|           | ${}^3F_4$ | 458   | 457 <sup>[3]</sup> ,<br>450 <sup>[5]</sup>                         | 24981.6 | 20121.3 <sup>[3]</sup><br>3] | 0     | 0 <sup>[3]</sup>     | 0.60 | 0.61 <sup>[3]</sup> |     |                                                              |
|           | ${}^3H_5$ | 516   |                                                                    | 94.5    |                              | 0     |                      | 0    |                     |     |                                                              |
|           | ${}^3H_4$ | 667   | 663 <sup>[3]</sup> ,<br>654 <sup>[5]</sup>                         | 2341.3  | 1648.0 <sup>[3]</sup>        | 0     | 0 <sup>[3]</sup>     | 0.05 | 0.05 <sup>[3]</sup> |     |                                                              |
|           | ${}^3F_3$ | 758   | 753 <sup>[3]</sup>                                                 | 1749.1  | 1381.1 <sup>[3]</sup>        | 112.9 | 88.2 <sup>[3]</sup>  | 0.04 | 0.04 <sup>[3]</sup> |     |                                                              |
|           | ${}^3F_2$ | 789   | 795 <sup>[3]</sup>                                                 | 1420.9  | 1083.1 <sup>[3]</sup>        | 69.9  | 52.2 <sup>[3]</sup>  | 0.04 | 0.03 <sup>[3]</sup> |     |                                                              |

|         |         |      |                    |         |      |      |    |                                       |
|---------|---------|------|--------------------|---------|------|------|----|---------------------------------------|
|         | $^1G_4$ | 1608 |                    | 235.9   | 0    | 0.01 |    |                                       |
| $^1I_6$ | $^3H_6$ | 290  | 290 <sup>[4]</sup> | 1687.4  | 78.6 | 0.09 | 53 | 25 <sup>[4]</sup> , 34 <sup>[6]</sup> |
|         | $^3F_4$ | 348  | 360 <sup>[4]</sup> | 10374.6 | 0    | 0.55 |    |                                       |
|         | $^3H_5$ | 381  |                    | 70.6    | 25.1 | 0.01 |    |                                       |
|         | $^3H_4$ | 457  |                    | 2945.3  | 0    | 0.16 |    |                                       |
|         | $^3F_3$ | 498  |                    | 26.4    | 0    | 0    |    |                                       |
|         | $^3F_2$ | 511  |                    | 781.0   | 0    | 0.04 |    |                                       |
|         | $^1G_4$ | 764  |                    | 2683.1  | 0    | 0.14 |    |                                       |
|         | $^1D_2$ | 1455 |                    | 70.0    | 0    | 0.01 |    |                                       |

---

**Table S5.** The calculated spontaneous emission rates and MD oscillator strengths for transitions  $\psi(SLJ\Gamma_i) \rightarrow \psi(S'L'J'\Gamma'_i)$  between different levels of  $\text{Tm}^{3+}$  in  $\text{Y}_2\text{O}_3$ .

| $^{2S+1}L_J$ (Sta.) <sup>a</sup> | $S'L'J'$ (Sta.)     | $\lambda$ (nm) | $A'_{MD}$ ( $\text{s}^{-1}$ ) | $P_{MD} \times 10^8$ |
|----------------------------------|---------------------|----------------|-------------------------------|----------------------|
| $^3\text{H}_5$ (23)              | $^3\text{H}_6$ (1)  | 1210           | 36.00                         | 79.09                |
|                                  | $^3\text{H}_6$ (2)  | 1215           | 21.98                         | 48.70                |
|                                  | $^3\text{H}_6$ (3)  | 1223           | 18.31                         | 41.11                |
| $^3\text{H}_5$ (24)              | $^3\text{H}_6$ (1)  | 1203           | 16.00                         | 34.72                |
|                                  | $^3\text{H}_6$ (2)  | 1208           | 36.74                         | 80.44                |
|                                  | $^3\text{H}_6$ (4)  | 1235           | 12.18                         | 27.89                |
|                                  | $^3\text{H}_6$ (5)  | 1236           | 14.00                         | 32.09                |
| $^3\text{H}_5$ (25)              | $^3\text{H}_6$ (1)  | 1200           | 11.26                         | 24.29                |
|                                  | $^3\text{H}_6$ (3)  | 1212           | 31.73                         | 69.96                |
|                                  | $^3\text{H}_6$ (4)  | 1231           | 16.59                         | 37.71                |
|                                  | $^3\text{H}_6$ (5)  | 1232           | 18.96                         | 43.16                |
|                                  | $^3\text{H}_6$ (8)  | 1264           | 3.01                          | 7.21                 |
| $^3\text{H}_5$ (26)              | $^3\text{H}_6$ (3)  | 1193           | 8.28                          | 17.66                |
|                                  | $^3\text{H}_6$ (4)  | 1211           | 32.12                         | 70.62                |
|                                  | $^3\text{H}_6$ (6)  | 1233           | 6.75                          | 15.38                |
|                                  | $^3\text{H}_6$ (7)  | 1236           | 15.85                         | 36.32                |
|                                  | $^3\text{H}_6$ (8)  | 1243           | 7.14                          | 16.54                |
|                                  | $^3\text{H}_6$ (9)  | 1252           | 18.61                         | 43.71                |
| $^3\text{H}_5$ (27)              | $^3\text{H}_6$ (2)  | 1184           | 5.79                          | 12.17                |
|                                  | $^3\text{H}_6$ (3)  | 1192           | 2.36                          | 5.03                 |
|                                  | $^3\text{H}_6$ (5)  | 1211           | 27.67                         | 60.83                |
|                                  | $^3\text{H}_6$ (6)  | 1232           | 5.05                          | 11.49                |
|                                  | $^3\text{H}_6$ (7)  | 1235           | 8.25                          | 18.89                |
|                                  | $^3\text{H}_6$ (8)  | 1242           | 28.43                         | 65.79                |
|                                  | $^3\text{H}_6$ (9)  | 1251           | 16.99                         | 39.86                |
|                                  | $^3\text{H}_6$ (9)  | 1251           | 16.99                         | 39.86                |
| $^3\text{H}_5$ (28)              | $^3\text{H}_6$ (3)  | 1184           | 7.54                          | 15.86                |
|                                  | $^3\text{H}_6$ (5)  | 1203           | 5.44                          | 11.80                |
|                                  | $^3\text{H}_6$ (6)  | 1223           | 29.71                         | 66.68                |
|                                  | $^3\text{H}_6$ (7)  | 1227           | 33.75                         | 76.17                |
|                                  | $^3\text{H}_6$ (8)  | 1234           | 5.18                          | 11.83                |
|                                  | $^3\text{H}_6$ (9)  | 1242           | 11.30                         | 26.15                |
|                                  | $^3\text{H}_6$ (11) | 1274           | 3.66                          | 8.90                 |
| $^3\text{H}_5$ (29)              | $^3\text{H}_6$ (4)  | 1200           | 5.80                          | 12.53                |
|                                  | $^3\text{H}_6$ (6)  | 1221           | 29.60                         | 66.16                |
|                                  | $^3\text{H}_6$ (7)  | 1225           | 20.69                         | 46.52                |
|                                  | $^3\text{H}_6$ (8)  | 1231           | 16.02                         | 36.40                |
|                                  | $^3\text{H}_6$ (9)  | 1240           | 18.24                         | 42.04                |

|                       |                       |      |       |        |
|-----------------------|-----------------------|------|-------|--------|
| ${}^3\text{H}_5$ (30) | ${}^3\text{H}_6$ (4)  | 1172 | 5.67  | 11.68  |
|                       | ${}^3\text{H}_6$ (6)  | 1192 | 2.19  | 4.66   |
|                       | ${}^3\text{H}_6$ (7)  | 1195 | 3.79  | 8.13   |
|                       | ${}^3\text{H}_6$ (8)  | 1202 | 19.02 | 41.17  |
|                       | ${}^3\text{H}_6$ (10) | 1236 | 20.41 | 46.75  |
|                       | ${}^3\text{H}_6$ (11) | 1240 | 39.82 | 91.82  |
|                       | ${}^3\text{H}_6$ (13) | 1258 | 10.52 | 24.95  |
| ${}^3\text{H}_5$ (31) | ${}^3\text{H}_6$ (5)  | 1172 | 6.25  | 12.88  |
|                       | ${}^3\text{H}_6$ (9)  | 1210 | 19.58 | 42.97  |
|                       | ${}^3\text{H}_6$ (10) | 1236 | 42.71 | 97.82  |
|                       | ${}^3\text{H}_6$ (11) | 1240 | 22.66 | 52.24  |
|                       | ${}^3\text{H}_6$ (12) | 1257 | 7.81  | 18.50  |
| ${}^3\text{H}_5$ (32) | ${}^3\text{H}_6$ (8)  | 1181 | 3.87  | 8.10   |
|                       | ${}^3\text{H}_6$ (10) | 1214 | 20.78 | 45.94  |
|                       | ${}^3\text{H}_6$ (12) | 1234 | 44.65 | 102.00 |
|                       | ${}^3\text{H}_6$ (13) | 1235 | 35.96 | 82.24  |
| ${}^3\text{H}_5$ (33) | ${}^3\text{H}_6$ (9)  | 1189 | 4.07  | 8.62   |
|                       | ${}^3\text{H}_6$ (11) | 1218 | 22.18 | 49.31  |
|                       | ${}^3\text{H}_6$ (12) | 1234 | 36.26 | 82.76  |
|                       | ${}^3\text{H}_6$ (13) | 1235 | 44.43 | 101.54 |
| ${}^3\text{H}_4$ (34) | ${}^3\text{F}_4$ (14) | 1446 | 8.63  | 27.07  |
|                       | ${}^3\text{F}_4$ (15) | 1461 | 10.23 | 32.72  |
|                       | ${}^3\text{F}_4$ (18) | 1535 | 3.45  | 12.18  |
|                       | ${}^3\text{H}_5$ (23) | 2340 | 3.20  | 26.30  |
| ${}^3\text{H}_4$ (35) | ${}^3\text{F}_4$ (16) | 1456 | 13.13 | 41.75  |
|                       | ${}^3\text{F}_4$ (20) | 1529 | 6.76  | 23.68  |
|                       | ${}^3\text{H}_5$ (24) | 2309 | 3.41  | 27.23  |
| ${}^3\text{H}_4$ (36) | ${}^3\text{F}_4$ (14) | 1418 | 8.99  | 27.08  |
|                       | ${}^3\text{F}_4$ (16) | 1449 | 9.90  | 31.14  |
|                       | ${}^3\text{F}_4$ (19) | 1519 | 3.96  | 13.68  |
| ${}^3\text{H}_4$ (37) | ${}^3\text{F}_4$ (14) | 1392 | 3.04  | 8.83   |
|                       | ${}^3\text{F}_4$ (18) | 1474 | 9.68  | 31.56  |
|                       | ${}^3\text{F}_4$ (22) | 1517 | 6.02  | 20.76  |
|                       | ${}^3\text{H}_5$ (28) | 2342 | 3.86  | 31.71  |
|                       | ${}^3\text{H}_5$ (29) | 2351 | 3.64  | 30.18  |
| ${}^3\text{H}_4$ (38) | ${}^3\text{F}_4$ (15) | 1396 | 9.50  | 27.77  |
|                       | ${}^3\text{F}_4$ (17) | 1459 | 8.58  | 27.41  |
|                       | ${}^3\text{F}_4$ (20) | 1481 | 3.05  | 10.04  |
|                       | ${}^3\text{H}_5$ (28) | 2316 | 3.23  | 25.95  |



|                       |                       |      |       |       |
|-----------------------|-----------------------|------|-------|-------|
| ${}^3\text{H}_4$ (39) | ${}^3\text{F}_4$ (15) | 1390 | 4.09  | 11.86 |
|                       | ${}^3\text{F}_4$ (17) | 1453 | 7.21  | 22.83 |
|                       | ${}^3\text{F}_4$ (18) | 1457 | 4.21  | 13.42 |
|                       | ${}^3\text{F}_4$ (22) | 1499 | 4.52  | 15.21 |
|                       | ${}^3\text{H}_5$ (31) | 2420 | 4.35  | 38.19 |
| ${}^3\text{H}_4$ (40) | ${}^3\text{F}_4$ (14) | 1369 | 3.19  | 8.95  |
|                       | ${}^3\text{F}_4$ (19) | 1464 | 8.95  | 28.77 |
|                       | ${}^3\text{F}_4$ (20) | 1465 | 3.47  | 11.15 |
|                       | ${}^3\text{F}_4$ (21) | 1471 | 6.72  | 21.79 |
|                       | ${}^3\text{H}_5$ (30) | 2396 | 5.19  | 44.68 |
| ${}^3\text{H}_4$ (41) | ${}^3\text{F}_4$ (17) | 1416 | 7.73  | 23.22 |
|                       | ${}^3\text{F}_4$ (18) | 1420 | 4.67  | 14.11 |
|                       | ${}^3\text{F}_4$ (22) | 1460 | 7.65  | 24.44 |
|                       | ${}^3\text{H}_5$ (32) | 2399 | 4.75  | 40.97 |
|                       | ${}^3\text{H}_5$ (33) | 2401 | 4.92  | 42.54 |
| ${}^3\text{H}_4$ (42) | ${}^3\text{F}_4$ (19) | 1432 | 9.24  | 28.41 |
|                       | ${}^3\text{F}_4$ (20) | 1434 | 4.23  | 13.04 |
|                       | ${}^3\text{F}_4$ (21) | 1439 | 8.88  | 27.56 |
|                       | ${}^3\text{H}_5$ (32) | 2393 | 4.61  | 39.53 |
|                       | ${}^3\text{H}_5$ (33) | 2395 | 4.14  | 35.60 |
| ${}^3\text{F}_3$ (43) | ${}^3\text{F}_4$ (14) | 1117 | 14.46 | 27.07 |
|                       | ${}^3\text{F}_4$ (15) | 1126 | 8.25  | 15.67 |
|                       | ${}^3\text{F}_4$ (17) | 1167 | 15.46 | 31.55 |
|                       | ${}^3\text{F}_4$ (18) | 1170 | 7.55  | 15.48 |
|                       | ${}^3\text{F}_4$ (20) | 1180 | 6.50  | 13.57 |
|                       | ${}^3\text{F}_4$ (21) | 1184 | 15.75 | 33.10 |
|                       | ${}^3\text{F}_4$ (22) | 1196 | 5.28  | 11.32 |
| ${}^3\text{F}_3$ (43) | ${}^3\text{F}_4$ (14) | 1114 | 21.13 | 39.32 |
|                       | ${}^3\text{F}_4$ (15) | 1123 | 25.87 | 48.88 |
|                       | ${}^3\text{F}_4$ (16) | 1133 | 18.65 | 35.91 |
|                       | ${}^3\text{F}_4$ (19) | 1176 | 4.43  | 9.19  |
|                       | ${}^3\text{F}_4$ (22) | 1193 | 3.07  | 6.54  |
| ${}^3\text{F}_3$ (45) | ${}^3\text{F}_4$ (14) | 1109 | 9.66  | 17.82 |
|                       | ${}^3\text{F}_4$ (16) | 1128 | 5.20  | 9.93  |
|                       | ${}^3\text{F}_4$ (17) | 1158 | 11.44 | 22.99 |
|                       | ${}^3\text{F}_4$ (18) | 1161 | 10.84 | 21.90 |
|                       | ${}^3\text{F}_4$ (19) | 1170 | 22.46 | 46.13 |
|                       | ${}^3\text{F}_4$ (21) | 1175 | 3.85  | 7.96  |
|                       | ${}^3\text{F}_4$ (22) | 1187 | 8.13  | 17.17 |
| ${}^3\text{F}_3$ (46) | ${}^3\text{F}_4$ (15) | 1117 | 6.72  | 12.58 |
|                       | ${}^3\text{F}_4$ (16) | 1127 | 5.39  | 10.27 |
|                       | ${}^3\text{F}_4$ (17) | 1157 | 19.66 | 39.45 |

|              |              |      |       |       |
|--------------|--------------|------|-------|-------|
|              | $^3F_4$ (19) | 1170 | 12.94 | 26.53 |
|              | $^3F_4$ (20) | 1170 | 12.49 | 25.65 |
|              | $^3F_4$ (21) | 1174 | 9.02  | 18.64 |
| $^3F_3$ (47) | $^3F_4$ (14) | 1107 | 3.59  | 6.60  |
|              | $^3F_4$ (16) | 1126 | 13.66 | 25.96 |
|              | $^3F_4$ (18) | 1158 | 13.38 | 26.92 |
|              | $^3F_4$ (19) | 1168 | 11.92 | 24.39 |
|              | $^3F_4$ (20) | 1169 | 7.31  | 14.98 |
|              | $^3F_4$ (21) | 1172 | 7.95  | 16.39 |
|              | $^3F_4$ (22) | 1184 | 13.24 | 27.84 |
| $^3F_3$ (48) | $^3F_4$ (15) | 1112 | 7.54  | 13.98 |
|              | $^3F_4$ (18) | 1154 | 10.43 | 20.85 |
|              | $^3F_4$ (20) | 1165 | 19.42 | 39.49 |
|              | $^3F_4$ (21) | 1168 | 16.36 | 33.48 |
|              | $^3F_4$ (22) | 1180 | 16.45 | 34.35 |
| $^3F_3$ (49) | $^3F_4$ (16) | 1119 | 5.69  | 10.67 |
|              | $^3F_4$ (17) | 1148 | 6.91  | 13.64 |
|              | $^3F_4$ (18) | 1151 | 10.42 | 20.68 |
|              | $^3F_4$ (19) | 1160 | 5.25  | 10.59 |
|              | $^3F_4$ (20) | 1161 | 13.84 | 27.96 |
|              | $^3F_4$ (21) | 1164 | 8.25  | 16.78 |
|              | $^3F_4$ (22) | 1176 | 16.11 | 33.43 |
| $^1G_4$ (55) | $^3F_4$ (15) | 657  | 7.28  | 4.71  |
|              | $^3F_4$ (16) | 661  | 5.77  | 3.78  |
|              | $^3F_4$ (17) | 671  | 5.95  | 4.02  |
|              | $^3H_5$ (23) | 791  | 6.89  | 6.46  |
|              | $^3H_5$ (24) | 794  | 34.83 | 32.89 |
|              | $^3H_5$ (25) | 795  | 3.88  | 3.68  |
|              | $^3H_5$ (26) | 804  | 39.27 | 38.07 |
|              | $^3H_5$ (27) | 804  | 27.65 | 26.83 |
|              | $^3H_5$ (28) | 808  | 14.37 | 14.07 |
|              | $^3H_5$ (29) | 809  | 23.09 | 22.67 |
|              | $^3H_4$ (34) | 1194 | 7.72  | 16.51 |
|              | $^3H_4$ (36) | 1215 | 9.00  | 19.91 |
| $^1G_4$ (56) | $^3F_4$ (14) | 650  | 4.41  | 2.79  |
|              | $^3F_4$ (19) | 670  | 3.84  | 2.59  |
|              | $^3H_5$ (23) | 784  | 16.54 | 15.24 |
|              | $^3H_5$ (25) | 789  | 42.25 | 39.39 |
|              | $^3H_5$ (26) | 797  | 26.58 | 25.33 |
|              | $^3H_5$ (27) | 798  | 38.36 | 36.58 |
|              | $^3H_5$ (28) | 801  | 7.07  | 6.80  |
|              | $^3H_5$ (29) | 802  | 11.17 | 10.77 |
|              | $^3H_4$ (34) | 1179 | 10.89 | 22.69 |
|              | $^3H_4$ (38) | 1225 | 11.94 | 26.86 |

|                     |                     |                     |       |       |
|---------------------|---------------------|---------------------|-------|-------|
|                     | $^3\text{H}_4$ (39) | 1230                | 3.39  | 7.69  |
| $^1\text{G}_4$ (57) | $^3\text{F}_4$ (18) | 665                 | 6.07  | 4.03  |
|                     | $^3\text{H}_5$ (23) | 782                 | 57.15 | 52.37 |
|                     | $^3\text{H}_5$ (24) | 785                 | 39.66 | 36.62 |
|                     | $^3\text{H}_5$ (25) | 786                 | 31.79 | 29.47 |
|                     | $^3\text{H}_5$ (26) | 795                 | 3.85  | 3.65  |
|                     | $^3\text{H}_5$ (29) | 800                 | 4.48  | 4.29  |
|                     | $^3\text{H}_4$ (35) | 1189                | 15.88 | 33.65 |
|                     | $^3\text{H}_4$ (36) | 1194                | 12.46 | 26.62 |
|                     | $^3\text{H}_4$ (38) | 1219                | 3.33  | 7.42  |
| $^1\text{G}_4$ (58) | $^3\text{F}_4$ (20) | 653                 | 3.63  | 2.32  |
|                     | $^3\text{H}_5$ (23) | 760                 | 23.69 | 20.51 |
|                     | $^3\text{H}_5$ (24) | 763                 | 27.70 | 24.16 |
|                     | $^3\text{H}_5$ (26) | 772                 | 19.25 | 17.22 |
|                     | $^3\text{H}_5$ (27) | 773                 | 4.87  | 4.36  |
|                     | $^3\text{H}_5$ (28) | 776                 | 41.35 | 37.34 |
|                     | $^3\text{H}_5$ (29) | 777                 | 19.65 | 17.78 |
|                     | $^3\text{H}_5$ (32) | 798                 | 4.07  | 3.89  |
|                     | $^3\text{H}_4$ (34) | 1126                | 7.19  | 13.66 |
|                     | $^3\text{H}_4$ (37) | 1161                | 21.20 | 42.82 |
|                     | $^3\text{H}_4$ (40) | 1177                | 3.67  | 7.63  |
|                     | $^1\text{G}_4$ (59) | $^3\text{F}_4$ (19) | 651   | 3.66  |
| $^3\text{H}_5$ (25) |                     | 763                 | 10.66 | 9.30  |
| $^3\text{H}_5$ (26) |                     | 771                 | 15.13 | 13.48 |
| $^3\text{H}_5$ (28) |                     | 775                 | 42.13 | 37.89 |
| $^3\text{H}_5$ (29) |                     | 775                 | 40.67 | 36.67 |
| $^3\text{H}_5$ (30) |                     | 788                 | 21.70 | 20.18 |
| $^3\text{H}_5$ (31) |                     | 788                 | 4.10  | 3.81  |
| $^3\text{H}_5$ (33) |                     | 797                 | 11.66 | 11.10 |
| $^3\text{H}_4$ (34) |                     | 1122                | 3.92  | 7.41  |
| $^3\text{H}_4$ (38) |                     | 1164                | 16.71 | 33.92 |
| $^3\text{H}_4$ (39) |                     | 1168                | 8.20  | 16.77 |
| $^3\text{H}_4$ (41) |                     | 1193                | 4.21  | 8.99  |
| $^1\text{G}_4$ (60) | $^3\text{F}_4$ (21) | 650                 | 3.07  | 1.94  |
|                     | $^3\text{H}_5$ (24) | 758                 | 8.56  | 7.37  |
|                     | $^3\text{H}_5$ (25) | 760                 | 10.27 | 8.88  |
|                     | $^3\text{H}_5$ (27) | 768                 | 48.82 | 43.15 |
|                     | $^3\text{H}_5$ (28) | 771                 | 12.03 | 10.72 |
|                     | $^3\text{H}_5$ (29) | 772                 | 6.12  | 5.47  |
|                     | $^3\text{H}_5$ (30) | 784                 | 32.86 | 30.30 |
|                     | $^3\text{H}_5$ (31) | 784                 | 29.18 | 26.91 |
|                     | $^3\text{H}_5$ (33) | 793                 | 4.74  | 4.47  |
|                     | $^3\text{H}_4$ (35) | 1128                | 11.33 | 21.62 |
|                     | $^3\text{H}_4$ (36) | 1133                | 6.68  | 12.86 |
|                     | $^3\text{H}_4$ (39) | 1160                | 5.15  | 10.39 |

|                     |                     |      |       |       |
|---------------------|---------------------|------|-------|-------|
|                     | $^3\text{H}_4$ (41) | 1185 | 8.04  | 16.93 |
|                     | $^3\text{H}_4$ (42) | 1187 | 3.31  | 6.99  |
| $^1\text{G}_4$ (61) | $^3\text{F}_4$ (17) | 641  | 3.37  | 2.08  |
|                     | $^3\text{H}_5$ (25) | 754  | 8.84  | 7.54  |
|                     | $^3\text{H}_5$ (26) | 762  | 17.47 | 15.21 |
|                     | $^3\text{H}_5$ (29) | 767  | 14.35 | 12.65 |
|                     | $^3\text{H}_5$ (30) | 779  | 35.09 | 31.89 |
|                     | $^3\text{H}_5$ (31) | 779  | 53.74 | 48.86 |
|                     | $^3\text{H}_5$ (32) | 788  | 12.71 | 11.82 |
|                     | $^3\text{H}_4$ (36) | 1121 | 6.15  | 11.59 |
|                     | $^3\text{H}_4$ (37) | 1138 | 4.49  | 8.71  |
|                     | $^3\text{H}_4$ (40) | 1154 | 14.08 | 28.10 |
|                     | $^3\text{H}_4$ (42) | 1174 | 13.08 | 27.02 |
|                     | $^3\text{F}_3$ (45) | 1438 | 3.41  | 10.55 |
| $^1\text{G}_4$ (62) | $^3\text{F}_4$ (22) | 647  | 5.37  | 3.37  |
|                     | $^3\text{H}_5$ (23) | 746  | 4.26  | 3.56  |
|                     | $^3\text{H}_5$ (25) | 750  | 4.74  | 4.00  |
|                     | $^3\text{H}_5$ (30) | 774  | 34.26 | 30.79 |
|                     | $^3\text{H}_5$ (32) | 783  | 44.41 | 40.82 |
|                     | $^3\text{H}_5$ (33) | 783  | 61.75 | 56.79 |
|                     | $^3\text{H}_4$ (40) | 1144 | 12.65 | 24.81 |
|                     | $^3\text{H}_4$ (42) | 1164 | 16.92 | 34.37 |
| $^1\text{G}_4$ (63) | $^3\text{F}_4$ (21) | 640  | 4.13  | 2.54  |
|                     | $^3\text{H}_5$ (28) | 757  | 3.42  | 2.93  |
|                     | $^3\text{H}_5$ (29) | 757  | 3.74  | 3.21  |
|                     | $^3\text{H}_5$ (31) | 769  | 33.99 | 30.15 |
|                     | $^3\text{H}_5$ (32) | 778  | 60.71 | 55.05 |
|                     | $^3\text{H}_5$ (33) | 778  | 46.40 | 42.10 |
|                     | $^3\text{H}_4$ (37) | 1118 | 4.25  | 7.96  |
|                     | $^3\text{H}_4$ (39) | 1128 | 10.78 | 20.54 |
|                     | $^3\text{H}_4$ (41) | 1151 | 20.30 | 40.32 |
| $^1\text{D}_2$ (64) | $^3\text{F}_3$ (43) | 763  | 40.34 | 35.19 |
|                     | $^3\text{F}_3$ (44) | 764  | 32.09 | 28.10 |
|                     | $^3\text{F}_3$ (45) | 767  | 3.26  | 2.88  |
|                     | $^3\text{F}_3$ (46) | 767  | 27.46 | 24.22 |
|                     | $^3\text{F}_2$ (50) | 793  | 47.53 | 44.79 |
|                     | $^3\text{F}_2$ (51) | 801  | 10.23 | 9.84  |
|                     | $^3\text{F}_2$ (52) | 804  | 4.86  | 4.71  |
|                     | $^3\text{F}_2$ (53) | 811  | 5.39  | 5.31  |
| $^1\text{D}_2$ (65) | $^3\text{F}_3$ (43) | 761  | 30.31 | 26.32 |
|                     | $^3\text{F}_3$ (44) | 763  | 19.80 | 17.26 |
|                     | $^3\text{F}_3$ (45) | 765  | 7.19  | 6.30  |
|                     | $^3\text{F}_3$ (47) | 766  | 26.92 | 23.67 |
|                     | $^3\text{F}_3$ (49) | 769  | 21.67 | 19.23 |

|              |              |     |       |       |
|--------------|--------------|-----|-------|-------|
|              | $^3F_2$ (51) | 799 | 25.08 | 24.00 |
|              | $^3F_2$ (52) | 802 | 17.64 | 17.03 |
|              | $^3F_2$ (53) | 809 | 8.43  | 8.26  |
| $^1D_2$ (66) | $^3F_3$ (44) | 757 | 13.93 | 11.97 |
|              | $^3F_3$ (45) | 760 | 45.85 | 39.66 |
|              | $^3F_3$ (46) | 760 | 35.18 | 30.45 |
|              | $^3F_3$ (47) | 761 | 24.42 | 21.18 |
|              | $^3F_2$ (50) | 785 | 39.00 | 36.05 |
|              | $^3F_2$ (51) | 793 | 5.56  | 5.24  |
|              | $^3F_2$ (52) | 797 | 15.18 | 14.45 |
|              | $^3F_2$ (54) | 807 | 8.20  | 8.02  |
| $^1D_2$ (67) | $^3F_3$ (44) | 751 | 17.55 | 14.86 |
|              | $^3F_3$ (45) | 754 | 15.34 | 13.06 |
|              | $^3F_3$ (47) | 755 | 22.60 | 19.30 |
|              | $^3F_3$ (48) | 756 | 35.14 | 30.15 |
|              | $^3F_3$ (49) | 758 | 22.91 | 19.74 |
|              | $^3F_2$ (51) | 787 | 37.43 | 34.74 |
|              | $^3F_2$ (52) | 790 | 14.26 | 13.35 |
|              | $^3F_2$ (53) | 796 | 19.62 | 18.64 |
| $^1D_2$ (68) | $^3F_3$ (45) | 752 | 4.56  | 3.87  |
|              | $^3F_3$ (46) | 753 | 14.20 | 12.06 |
|              | $^3F_3$ (48) | 755 | 36.86 | 31.50 |
|              | $^3F_3$ (49) | 757 | 30.38 | 26.07 |
|              | $^3F_2$ (51) | 785 | 6.50  | 6.00  |
|              | $^3F_2$ (52) | 789 | 11.48 | 10.70 |
|              | $^3F_2$ (53) | 795 | 9.69  | 9.17  |
|              | $^3F_2$ (54) | 799 | 36.08 | 34.55 |
| $^1I_6$ (69) | $^3H_6$ (11) | 301 | 5.43  | 0.74  |
|              | $^3F_4$ (17) | 359 | 3.26  | 0.63  |
|              | $^3H_5$ (28) | 394 | 8.25  | 1.92  |
|              | $^3H_5$ (29) | 395 | 4.95  | 1.16  |
| $^1I_6$ (70) | $^3F_4$ (14) | 354 | 3.24  | 0.61  |
|              | $^3H_5$ (28) | 394 | 7.14  | 1.67  |
|              | $^3H_5$ (29) | 395 | 5.97  | 1.39  |
| $^1I_6$ (71) | $^3H_5$ (31) | 392 | 8.68  | 1.99  |
|              | $^3H_5$ (32) | 394 | 4.04  | 0.94  |
|              | $^1G_4$ (58) | 777 | 3.22  | 2.91  |
| $^1I_6$ (72) | $^3F_4$ (15) | 349 | 3.03  | 0.55  |
|              | $^3H_5$ (30) | 391 | 7.93  | 1.81  |
|              | $^3H_5$ (33) | 393 | 4.27  | 0.99  |
| $^1I_6$ (73) | $^3H_5$ (27) | 386 | 5.16  | 1.16  |

|                     |                     |      |       |       |
|---------------------|---------------------|------|-------|-------|
|                     | $^3\text{H}_5$ (30) | 390  | 6.04  | 1.38  |
|                     | $^3\text{H}_5$ (33) | 393  | 5.16  | 1.19  |
| $^1\text{I}_6$ (74) | $^3\text{H}_5$ (26) | 386  | 3.46  | 0.77  |
|                     | $^3\text{H}_5$ (31) | 390  | 4.93  | 1.12  |
|                     | $^3\text{H}_5$ (32) | 392  | 7.37  | 1.70  |
|                     | $^3\text{H}_5$ (33) | 392  | 3.07  | 0.71  |
| $^1\text{I}_6$ (75) | $^3\text{F}_4$ (19) | 352  | 4.49  | 0.83  |
|                     | $^3\text{H}_5$ (23) | 381  | 4.19  | 0.91  |
|                     | $^3\text{H}_5$ (25) | 382  | 6.58  | 1.44  |
|                     | $^1\text{G}_4$ (61) | 773  | 3.95  | 3.54  |
| $^1\text{I}_6$ (76) | $^3\text{H}_5$ (23) | 379  | 10.96 | 2.36  |
|                     | $^3\text{H}_5$ (24) | 379  | 7.50  | 1.62  |
| $^1\text{I}_6$ (77) | $^3\text{H}_5$ (23) | 378  | 7.76  | 1.66  |
|                     | $^3\text{H}_5$ (24) | 378  | 10.84 | 2.33  |
| $^1\text{I}_6$ (78) | $^3\text{H}_5$ (25) | 376  | 4.78  | 1.01  |
|                     | $^3\text{H}_5$ (26) | 378  | 4.87  | 1.04  |
|                     | $^3\text{H}_5$ (29) | 379  | 3.13  | 0.68  |
|                     | $^3\text{H}_5$ (30) | 382  | 4.66  | 1.02  |
| $^1\text{I}_6$ (79) | $^3\text{H}_5$ (25) | 376  | 6.01  | 1.27  |
|                     | $^3\text{H}_5$ (31) | 382  | 3.66  | 0.80  |
| $^3\text{P}_0$ (80) | $^3\text{F}_4$ (17) | 343  | 3.01  | 0.53  |
|                     | $^3\text{F}_4$ (19) | 344  | 6.38  | 1.13  |
|                     | $^3\text{F}_4$ (20) | 344  | 5.86  | 1.04  |
|                     | $^3\text{F}_4$ (21) | 344  | 5.45  | 0.97  |
| $^1\text{I}_6$ (81) | $^3\text{H}_5$ (26) | 373  | 3.05  | 0.64  |
|                     | $^3\text{H}_5$ (27) | 373  | 3.49  | 0.73  |
|                     | $^3\text{H}_5$ (28) | 374  | 3.26  | 0.68  |
|                     | $^3\text{H}_5$ (29) | 374  | 3.71  | 0.78  |
|                     | $^3\text{H}_5$ (32) | 379  | 4.93  | 1.06  |
| $^1\text{I}_6$ (82) | $^3\text{H}_5$ (27) | 373  | 4.00  | 0.83  |
|                     | $^3\text{H}_5$ (28) | 374  | 3.12  | 0.66  |
|                     | $^3\text{H}_5$ (29) | 374  | 3.64  | 0.76  |
|                     | $^3\text{H}_5$ (33) | 379  | 4.32  | 0.93  |
| $^3\text{P}_1$ (83) | $^3\text{H}_5$ (28) | 365  | 4.50  | 0.90  |
|                     | $^3\text{F}_2$ (51) | 482  | 5.86  | 2.04  |
|                     | $^3\text{F}_2$ (53) | 485  | 6.97  | 2.46  |
|                     | $^3\text{F}_2$ (54) | 487  | 9.53  | 3.39  |
|                     | $^3\text{P}_2$ (66) | 1227 | 12.92 | 29.16 |
|                     | $^3\text{P}_2$ (67) | 1242 | 13.96 | 32.30 |

|              |              |              |       |       |
|--------------|--------------|--------------|-------|-------|
|              | $^1D_2$ (68) | 1246         | 11.57 | 26.95 |
| $^3P_1$ (84) | $^3H_4$ (42) | 433          | 3.27  | 0.92  |
|              | $^3F_3$ (47) | 465          | 3.06  | 0.99  |
|              | $^3F_2$ (50) | 474          | 5.02  | 1.69  |
|              | $^3F_2$ (51) | 477          | 9.77  | 3.34  |
|              | $^3F_2$ (52) | 479          | 10.83 | 3.72  |
|              | $^3F_2$ (54) | 482          | 6.19  | 2.16  |
|              | $^3P_2$ (64) | 1182         | 11.20 | 23.44 |
|              | $^3P_2$ (65) | 1186         | 9.77  | 20.60 |
|              | $^3P_2$ (67) | 1213         | 4.34  | 9.59  |
|              | $^1D_2$ (68) | 1217         | 8.99  | 19.98 |
| $^3P_1$ (85) | $^3F_3$ (49) | 465          | 3.27  | 1.06  |
|              | $^3F_2$ (50) | 473          | 12.79 | 4.29  |
|              | $^3F_2$ (51) | 476          | 3.09  | 1.05  |
|              | $^3F_2$ (52) | 477          | 4.54  | 1.55  |
|              | $^3F_2$ (53) | 479          | 9.29  | 3.20  |
|              | $^3P_2$ (64) | 1172         | 10.61 | 21.84 |
|              | $^3P_2$ (65) | 1176         | 11.01 | 22.82 |
|              | $^3P_2$ (66) | 1189         | 8.50  | 17.99 |
|              | $^3P_2$ (67) | 1203         | 3.07  | 6.67  |
|              | $^3P_2$ (86) | $^3F_3$ (43) | 435   | 46.35 |
| $^3F_3$ (44) |              | 435          | 10.01 | 2.84  |
| $^3F_3$ (45) |              | 436          | 40.70 | 11.60 |
| $^3F_3$ (47) |              | 436          | 38.68 | 11.04 |
| $^3F_2$ (53) |              | 450          | 3.88  | 1.18  |
| $^3P_2$ (64) |              | 1011         | 51.55 | 79.05 |
| $^3P_2$ (66) |              | 1024         | 38.93 | 61.19 |
| $^3P_2$ (87) |              | $^3F_3$ (43) | 432   | 28.70 |
|              | $^3F_3$ (44) | 432          | 16.49 | 4.61  |
|              | $^3F_3$ (46) | 433          | 31.93 | 8.97  |
|              | $^3F_3$ (47) | 433          | 4.92  | 1.39  |
|              | $^3F_3$ (48) | 434          | 24.43 | 6.89  |
|              | $^3F_3$ (49) | 434          | 24.70 | 6.98  |
|              | $^3F_2$ (54) | 448          | 4.35  | 1.31  |
|              | $^3P_2$ (64) | 994          | 7.08  | 10.49 |
|              | $^3P_2$ (65) | 997          | 43.92 | 65.44 |
|              | $^3P_2$ (66) | 1006         | 8.62  | 13.07 |
|              | $^3P_2$ (67) | 1016         | 25.32 | 39.21 |
|              | $^1D_2$ (68) | 1019         | 6.64  | 10.34 |
|              | $^3P_2$ (88) | $^3F_3$ (43) | 430   | 18.65 |
| $^3F_3$ (44) |              | 430          | 15.57 | 4.32  |
| $^3F_3$ (45) |              | 431          | 9.69  | 2.70  |
| $^3F_3$ (46) |              | 431          | 34.16 | 9.51  |
| $^3F_3$ (47) |              | 431          | 7.00  | 1.95  |

|                                  |                                  |      |       |       |
|----------------------------------|----------------------------------|------|-------|-------|
|                                  | <sup>3</sup> F <sub>3</sub> (48) | 432  | 29.99 | 8.38  |
|                                  | <sup>3</sup> F <sub>3</sub> (49) | 432  | 14.93 | 4.18  |
|                                  | <sup>3</sup> F <sub>2</sub> (54) | 446  | 3.29  | 0.98  |
|                                  | <sup>3</sup> P <sub>2</sub> (64) | 984  | 7.32  | 10.62 |
|                                  | <sup>3</sup> P <sub>2</sub> (65) | 987  | 21.12 | 30.83 |
|                                  | <sup>3</sup> P <sub>2</sub> (66) | 996  | 25.18 | 37.42 |
|                                  | <sup>3</sup> P <sub>2</sub> (67) | 1006 | 28.66 | 43.47 |
|                                  | <sup>1</sup> D <sub>2</sub> (68) | 1009 | 5.21  | 7.95  |
| <sup>3</sup> P <sub>2</sub> (89) | <sup>3</sup> F <sub>3</sub> (44) | 425  | 17.79 | 4.82  |
|                                  | <sup>3</sup> F <sub>3</sub> (45) | 426  | 34.37 | 9.35  |
|                                  | <sup>3</sup> F <sub>3</sub> (46) | 426  | 23.15 | 6.30  |
|                                  | <sup>3</sup> F <sub>3</sub> (47) | 426  | 37.51 | 10.22 |
|                                  | <sup>3</sup> F <sub>3</sub> (49) | 427  | 5.79  | 1.59  |
|                                  | <sup>3</sup> P <sub>2</sub> (64) | 959  | 12.33 | 17.00 |
|                                  | <sup>3</sup> P <sub>2</sub> (65) | 962  | 8.23  | 11.41 |
|                                  | <sup>3</sup> P <sub>2</sub> (67) | 980  | 36.83 | 53.00 |
|                                  | <sup>1</sup> D <sub>2</sub> (68) | 982  | 13.37 | 19.35 |
| <sup>3</sup> P <sub>2</sub> (90) | <sup>3</sup> F <sub>3</sub> (44) | 424  | 12.53 | 3.37  |
|                                  | <sup>3</sup> F <sub>3</sub> (45) | 424  | 6.57  | 1.77  |
|                                  | <sup>3</sup> F <sub>3</sub> (47) | 425  | 9.29  | 2.51  |
|                                  | <sup>3</sup> F <sub>3</sub> (48) | 425  | 42.38 | 11.49 |
|                                  | <sup>3</sup> F <sub>3</sub> (49) | 426  | 44.02 | 11.96 |
|                                  | <sup>3</sup> P <sub>2</sub> (64) | 950  | 6.55  | 8.86  |
|                                  | <sup>3</sup> P <sub>2</sub> (66) | 961  | 23.42 | 32.46 |
|                                  | <sup>1</sup> D <sub>2</sub> (68) | 973  | 40.82 | 57.98 |

<sup>a</sup>Only transitions between 300-2500 nm with emission rates  $A_{MD} > 3 \text{ s}^{-1}$  are listed.



## Appendix – Method and equations for the calculations of energy levels and transition intensities

The model Hamiltonian for  $Tm^{3+}$  is defined as<sup>[7]-[8]</sup>

$$\begin{aligned}
 H_f = E_{AVE} + \sum_{k=2,4,6} F^k f_k + \zeta_{4f} \times \sum_i \vec{l}_i \cdot \vec{s}_i + \alpha L(L+1) + \beta G(G_2) + \gamma G(R_7) \\
 + \sum_{j=0,2,4} M^j m_j + \sum_{k=2,4,6} P^k p_k
 \end{aligned} \tag{A1}$$

where  $E_{AVE}$  represents the barycenter energy of the  $4f^3$  configuration. The next seven terms represent the Coulomb repulsion, spin-orbit, two-body, three-body, spin-other-orbit and electrostatically correlated spin-orbit interactions. Moreover,  $F^k$  and  $\zeta_{4f}$  are the radial parts of the electrostatic and spin-orbit coupling constant. Two-body parameters are represented by  $\alpha$ ,  $\beta$ , and  $\gamma$ .  $G(G_2)$  and  $G(R_7)$  represent the eigenvalues of the Casimir's operators for the Lie groups  $G_2$  and  $R_7$ . The remaining parameters,  $M^j$  and  $P^k$ , are used to represent the Marvin integrals and spin-orbit perturbations.

The crystal field interaction  $H_{CF}$  for  $Tm^{3+}$  in  $Y_2O_3$ , in the form of Wybourne normalization, can be expressed as<sup>[9]</sup>

$$\begin{aligned}
 H_{CF} = B_2^0 C_2^0 + ReB_2^2 (C_2^2 + C_2^{-2}) + B_4^0 C_4^0 \\
 + ReB_4^2 (C_4^2 + C_4^{-2}) + iImB_4^2 (C_4^2 - C_4^{-2}) \\
 + ReB_4^4 (C_4^4 + C_4^{-4}) + iImB_4^4 (C_4^4 - C_4^{-4}) + B_6^0 C_6^0 \\
 + ReB_6^2 (C_6^2 + C_6^{-2}) + iImB_6^2 (C_6^2 - C_6^{-2}) \\
 + ReB_6^4 (C_6^4 + C_6^{-4}) + iImB_6^4 (C_6^4 - C_6^{-4}) \\
 + ReB_6^6 (C_6^6 + C_6^{-6}) + iImB_6^6 (C_6^6 - C_6^{-6})
 \end{aligned} \tag{A2}$$

where  $C_q^k$  are the normalized spherical-tensor operators and  $B_q^k$  are the crystal field parameters (CFPs). The values of these CFPs can be determined by the least-squares fit to the observed energy levels.<sup>[9]</sup>

The ED ( $A_{ED}$ ) radiative decay rates can be written as<sup>[10]-[11]</sup>

$$A_{ED(SLJ \rightarrow S'L'J')} = \frac{16\pi^3 e^2}{3\varepsilon_0 h c^3} \frac{\nu^3}{(2J+1)} \chi_{ED} \sum_{\lambda=2,4,6} \Omega_{(\lambda)} \left| \left\langle l^N SLJ \parallel U^{(\lambda)} \parallel l^N S'L'J' \right\rangle \right|^2 \quad (\text{A3})$$

where  $\nu$  is the transition frequency,  $n$  is the refractive index and  $\chi_{ED}$  is the local-field correction for ED induced transitions with the form of  $(n^2+1)^2/(9n)$  and  $n(n^2+1)^2/9$  for absorption and emission transition, respectively. The Judd-Ofelt intensity parameters  $\Omega_{(\lambda)}$  should be summed over  $\lambda=2,4,6$  for a product with the even-rank reduced matrix elements of the  $U^{(\lambda)}$  tensor operator.

The MD ( $A_{MD}$ ) radiative decay rates can be written as<sup>[10]-[11]</sup>

$$A_{MD} = \frac{\pi h e^2}{3\varepsilon_0 c^5 m_e^2} \frac{\nu^3}{g} \chi_{MD} \left| \left\langle l^N \psi \parallel L + g_e S \parallel l^N \psi' \right\rangle \right|^2 \quad (\text{A4})$$

where  $g_e = 2.00232$  is the gyromagnetic ratio of the electron and  $g$  is the degeneracy of the initial level.  $\chi_{MD}$  is the local-field correction for MD induced transitions with the form of  $n$  and  $n^3$  for the absorption and emission transition, respectively.  $\psi$  and  $\psi'$  are the statevectors for the initial and terminating levels for the  $\psi \rightarrow \psi'$  transition, respectively. For transitions between J-multiplets, the statevector takes the form of  $\psi(SLJ)$  with  $g = (2J+1)$  while for transitions between crystal field levels, it takes the form of  $\psi(SLJ_i)$ .

The radiative lifetime can be written as<sup>[10]-[11]</sup>

$$\tau_{SLJ} = \frac{1}{\sum_{S'L'J'} (A_{ED(SLJ \rightarrow S'L'J')} + A_{MD(SLJ \rightarrow S'L'J')})} \quad (\text{A5})$$

The branching ratio can be written as<sup>[10]-[11]</sup>

$$\beta_{(SLJ \rightarrow SL'J')} = \tau_{SLJ} \times [A_{ED(SLJ \rightarrow SL'J')} + A_{MD(SLJ \rightarrow SL'J')}] \quad (\text{A6})$$

The MD absorption oscillator strengths can be written as<sup>[10]-[11]</sup>

$$P_{MD} = \frac{h\nu}{6m_e c^2} \frac{n}{(2J+1)} \left| \langle l^N SLJ \| L + g_e S \| l^N SLJ' \rangle \right|^2 \quad (\text{A7})$$

## References

- [1] Gruber, J. B.; Krupke, W. F.; Poindexter, J. M. Crystal-Field Splitting of Trivalent Thulium and Erbium J Levels in Yttrium Oxide. *J. Chem. Phys.* **1964**, *41*, 3363–3377.
- [2] Leavitt, R. P.; Gruber, J. B.; Chang, N. C.; Morrison, C. A. Optical Spectra, Energy Levels, and Crystal-Field Analysis of Tripositive Rare-Earth Ions in  $Y_2O_3$ . II. Non-Kramers Ions in  $C_2$  Sites. *J. Chem. Phys.* **1982**, *76*, 4775–4788.
- [3] Ermeneux, F. S.; Goutaudier, C.; Moncorge, R.; Cohen-Adad, M. T.; Bettinelli, M.; Cavalli, E. Growth and Fluorescence Properties of  $Tm^{3+}$  Doped  $YVO_4$  and  $Y_2O_3$  Single Crystals. *Opt. Mater.* **1997**, *8*, 83–90.
- [4] Guyot, Y.; Moncorge, R.; Merkle, L. D.; Pinto, A.; McIntosh, B.; Verdun, H. Luminescence Properties of  $Y_2O_3$  Single Crystals Doped with  $Pr^{3+}$  or  $Tm^{3+}$  and Codoped with  $Yb^{3+}$ ,  $Tb^{3+}$  or  $Ho^{3+}$  Ions. *Opt. Mater.* **1996**, *5*, 127–136.
- [5] Martin, I. R.; Goutaudier, C.; Guy, S.; Guyot, Y.; Boulon, G.; Cohen-Adad, M. T.; Joubert, M. F. Room-Temperature Photon Avalanche Upconversion in  $Tm^{3+}:Y_2O_3$  Crystal. *Phys. Rev. B* **1999**, *60*, 7252–7257.
- [6] Weber, M. J. Radiative and Multiphonon Relaxation of Rare-Earth Ions in  $Y_2O_3$ . *Phys. Rev.* **1968**, *171*, 283–291.
- [7] Gorller-Walrand, C.; Binnemans, K. Handbook on the Physics and Chemistry of Rare Earths, ed. Gschneidner, K. A. and Eyring, L. *Elsevier Science* **1996**, *23*.
- [8] Henderson, B.; Imbusch, G. F. Optical Spectroscopy of Inorganic Solids. *Clarendon Press, Oxford* **1989**.
- [9] Yeung, Y. Y.; Newman, D. J. High Order Crystal Field Invariants and the Determination of Lanthanide Crystal Field Parameters. *J. Chem. Phys.* **1986**, *84*, 4470–4473.
- [10] Walrand, C. G.; Fluyt, L.; Ceulemans, A.; Carnall, W. T. Magnetic Dipole Transitions as Standards for Judd-Ofelt Parametrization in Lanthanide Spectra. *J. Chem. Phys.* **1991**, *95*, 3099–3106.
- [11] Hehlen, M. P.; Brik, M. G.; Krämer, K. W. 50th Anniversary of the Judd-Ofelt Theory: An Experimentalist's View of the Formalism and Its Application. *J. Lumin.* **2013**, *136*, 221–239.
